# Supplementary material for: Risk behaviors of 15–21 year olds in Mexico lead to a high prevalence of sexually transmitted infections: results of a survey in disadvantaged urban areas
Source: PubMed Central journal article supplement (PMC1409781; doi:10.1186/1471-2458-6-49), 2006-02-27
Supplement: 1471-2458-6-49-S1.pdf [file 1471-2458-6-49-S1.pdf]

# Survey of Urban Households 2001S

## Youth questionnaire (10 to 21 years)

Copy the number  
of the sticker of the page

Stick the household number here

|                                                                    |                                                                                  |                                                                |
|--------------------------------------------------------------------|----------------------------------------------------------------------------------|----------------------------------------------------------------|
| <b>Registration number of the interviewee</b> <input type="text"/> |                                                                                  |                                                                |
| <b>Name:</b>                                                       |                                                                                  |                                                                |
| <b>Date of Birth</b>                                               | <input type="text"/> <input type="text"/> <input type="text"/><br>Day Month YEAR |                                                                |
| <b>Sex:</b> <input type="text"/>                                   | <b>Age:</b> <input type="text"/> Years                                           | <b>civil status:</b> <input type="text"/><br>(transcribe code) |
| Male ..... 1                                                       |                                                                                  |                                                                |
| Female ..... 2                                                     |                                                                                  |                                                                |

| VISITS OF THE INTERVIEWER      | 1                                                                                | 2                                                                                | 3                                                                                | 4                                                                                |
|--------------------------------|----------------------------------------------------------------------------------|----------------------------------------------------------------------------------|----------------------------------------------------------------------------------|----------------------------------------------------------------------------------|
| DATE                           | <input type="text"/> <input type="text"/> <input type="text"/><br>DAY MONTH YEAR | <input type="text"/> <input type="text"/> <input type="text"/><br>DAY MONTH YEAR | <input type="text"/> <input type="text"/> <input type="text"/><br>DAY MONTH YEAR | <input type="text"/> <input type="text"/> <input type="text"/><br>DAY MONTH YEAR |
| NAME OF THE INTERVIEWER        |                                                                                  |                                                                                  |                                                                                  |                                                                                  |
| NUMBER OF THE INTERVIEWER      | <input type="text"/>                                                             | <input type="text"/>                                                             | <input type="text"/>                                                             | <input type="text"/>                                                             |
| TIME STARTED                   | <input type="text"/>                                                             | <input type="text"/>                                                             | <input type="text"/>                                                             | <input type="text"/>                                                             |
| TIME ENDED                     | <input type="text"/>                                                             | <input type="text"/>                                                             | <input type="text"/>                                                             | <input type="text"/>                                                             |
| DURATION                       | <input type="text"/> min                                                         | <input type="text"/> min                                                         | <input type="text"/> min                                                         | <input type="text"/> min                                                         |
| NUMBER OF THE PERSON ANSWERING | <input type="text"/>                                                             | <input type="text"/>                                                             | <input type="text"/>                                                             | <input type="text"/>                                                             |
| RESULTS                        | <input type="text"/>                                                             | <input type="text"/>                                                             | <input type="text"/>                                                             | <input type="text"/>                                                             |

\*Results codes

- |                                                                   |                                                                   |
|-------------------------------------------------------------------|-------------------------------------------------------------------|
| <p>↓</p> <p>01 Interview complete<br/>02 Interview incomplete</p> | <p>05 They refused (why?)<br/>09 Other (Note on observations)</p> |
|-------------------------------------------------------------------|-------------------------------------------------------------------|

NOTE REASONS IN TEXT

OBSERVATIONS

|               |              |          |          |
|---------------|--------------|----------|----------|
| SUPERVISED BY | CRITICADO BY | CODED BY | TAPED BY |
|---------------|--------------|----------|----------|

NAME

NUMBER

|      |                                                                                  |                                                                                  |                                                                                  |                                                                                  |
|------|----------------------------------------------------------------------------------|----------------------------------------------------------------------------------|----------------------------------------------------------------------------------|----------------------------------------------------------------------------------|
| DATE | <input type="text"/> <input type="text"/> <input type="text"/><br>DAY MONTH YEAR | <input type="text"/> <input type="text"/> <input type="text"/><br>DAY MONTH YEAR | <input type="text"/> <input type="text"/> <input type="text"/><br>DAY MONTH YEAR | <input type="text"/> <input type="text"/> <input type="text"/><br>DAY MONTH YEAR |
|------|----------------------------------------------------------------------------------|----------------------------------------------------------------------------------|----------------------------------------------------------------------------------|----------------------------------------------------------------------------------|

Good morning (afternoon), my name is \_\_\_\_\_ and I work for the National Institute of Public Health. We are visiting households to speak about health, education, nutrition and some other things related to these issues. Your responses will be a great help for this study. The information that you give us is confidential and will only be used for statistical research and none of the results presented will make reference to any people in particular. You do not have to respond if you don't wish to and this won't affect you in any way. Also, at any moment you can decide that you do not want to continue anymore or you can also tell us if you don't want to respond to certain questions. The information that you give us will help improve social programs related to health and we are going to give you information about your health status.. Do you agree to answer the questionnaire?

Interviewer signature that the interviewee agreed to answer the questionnaire.

## I. EDUCATION

|                                                                                                                                                                                                                                                           |                                                                                                  | <b>SKIP TO</b> |
|-----------------------------------------------------------------------------------------------------------------------------------------------------------------------------------------------------------------------------------------------------------|--------------------------------------------------------------------------------------------------|----------------|
| 1. What is the maximum level of school that you have finished?<br><br><div style="border: 1px solid black; padding: 2px; width: fit-content; margin: 5px auto;">CIRCLE THE LAST YEAR COMPLETED</div>                                                      | Never gone to school .....                                                                       | 66 → 25        |
|                                                                                                                                                                                                                                                           | None .....                                                                                       | 00             |
|                                                                                                                                                                                                                                                           | Pre-school or kindergarten .....                                                                 | 01             |
|                                                                                                                                                                                                                                                           | Elementary .....                                                                                 | 02             |
|                                                                                                                                                                                                                                                           | Secondary .....                                                                                  | 03             |
|                                                                                                                                                                                                                                                           | Preparatory .....                                                                                | 04             |
|                                                                                                                                                                                                                                                           | Normal Basic .....                                                                               | 05             |
|                                                                                                                                                                                                                                                           | Technical or commercial degree .....                                                             | 06             |
|                                                                                                                                                                                                                                                           | Bachelor's Degree .....                                                                          | 07             |
|                                                                                                                                                                                                                                                           | Postgraduate .....                                                                               | 08 → 25        |
| DON'T KNOW .....                                                                                                                                                                                                                                          | 98 → 25                                                                                          |                |
| NO RESPONSE .....                                                                                                                                                                                                                                         | 99                                                                                               |                |
| 2. What is the last grade in school you passed?<br><br><div style="border: 1px solid black; padding: 2px; width: fit-content; margin: 5px auto;">NOTE THE NUMBER OF THE LAST GRADE (YEAR) PASSED</div>                                                    | Grade  __ __                                                                                     |                |
|                                                                                                                                                                                                                                                           | DON'T KNOW .....                                                                                 | 98             |
|                                                                                                                                                                                                                                                           | NO RESPONSE .....                                                                                | 99             |
|                                                                                                                                                                                                                                                           | <b>ASK THE NEXT QUESTION ONLY IF CODE06 OF QUESTION 1 WAS MARKED, IF NOT, SKIP TO QUESTION 4</b> |                |
| 3. How many prerequisites were required to get into this degree program?<br><br><div style="border: 1px solid black; padding: 2px; width: fit-content; margin: 5px auto;">ONLY FOR THOSE THAT ANSWERED TECHNICAL OR COMMERCIAL DEGREE IN QUESTION 1</div> | None .....                                                                                       | 1              |
|                                                                                                                                                                                                                                                           | Primary Completed .....                                                                          | 2              |
|                                                                                                                                                                                                                                                           | Secondary Completed .....                                                                        | 3              |
|                                                                                                                                                                                                                                                           | Preparatory Completed .....                                                                      | 4              |
|                                                                                                                                                                                                                                                           | DON'T KNOW .....                                                                                 | 8              |
|                                                                                                                                                                                                                                                           | NO RESPONSE .....                                                                                | 9              |
| 4. Are you currently attending school?                                                                                                                                                                                                                    | Yes .....                                                                                        | 1 → 6          |
|                                                                                                                                                                                                                                                           | No .....                                                                                         | 2              |
|                                                                                                                                                                                                                                                           | DON'T KNOW .....                                                                                 | 8              |
|                                                                                                                                                                                                                                                           | NO RESPONSE .....                                                                                | 9              |
|                                                                                                                                                                                                                                                           |                                                                                                  | ] → 25         |

|                                                                                                                                                       |                                                                                                                                                                                                                                                        |             |
|-------------------------------------------------------------------------------------------------------------------------------------------------------|--------------------------------------------------------------------------------------------------------------------------------------------------------------------------------------------------------------------------------------------------------|-------------|
| <p>5. At what age did you leave school?</p>                                                                                                           | <p style="text-align: right;">Age  __ __ </p> <p>DON'T KNOW .....98</p> <p>NO RESPONSE ..... 99</p>                                                                                                                                                    | <p>→ 25</p> |
| <p>6. What is the name and location of the school that you attend?</p>                                                                                | <p>Name</p> <p>Locality/colony</p> <p>Municipality</p> <p>Zip code</p>                                                                                                                                                                                 |             |
| <p>7. The school that you attend is ...</p>                                                                                                           | <p>Public ?.....1</p> <p>Private non - religious?.....2</p> <p>Private religious?.....3</p> <p>DON'T KNOW .....8</p> <p>NO RESPONSE .....9</p>                                                                                                         |             |
| <p>8. In what turn do you attend school?</p> <p>9. Do you use transportation to get to school?</p>                                                    | <p>Morning .....1</p> <p>Afternoon.....2</p> <p>Night .....3</p> <p>DON'T KNOW .....8</p> <p>NO RESPONSE .....9</p> <p>Yes ..... 1</p> <p>No .....2</p> <p>DON'T KNOW .....8</p> <p>NO RESPONSE .....9</p>                                             |             |
| <p>10. How much time do you take to get to school?</p>                                                                                                | <p style="text-align: center;">hours  __           minutes __ __ </p> <p>DON'T KNOW .....8 .....98</p> <p>NO RESPONSE .....9 .....99</p>                                                                                                               |             |
| <p>11. On an average day, how many hours per day do you spend at school?</p> <p>12. In the past four weeks, how many days have you missed school?</p> | <p style="text-align: right;">Hours per day  __ __ . __ </p> <p>DON'T KNOW .....98.8</p> <p>NO RESPONSE ..... 99.9</p> <p style="text-align: right;">Days  __ __ </p> <p>Did not miss.....00</p> <p>DON'T KNOW .....98</p> <p>NO RESPONSE ..... 99</p> |             |
| <p><b>INTERVIEWER: THE RESPONSE CANNOT BE MORE THAN 24 DAYS</b><br/> <b>NO PUEDE SER MAYOR A 24 DÍAS</b></p>                                          |                                                                                                                                                                                                                                                        |             |
| <p>13. Outside of school how many hours a week do you spend studying and doing homework?</p>                                                          | <p style="text-align: right;">Hours  __ __ </p> <p>DON'T KNOW .....98</p> <p>NO RESPONSE ..... 99</p>                                                                                                                                                  |             |

|                                                                                                                                         |                                                                                                                                  |                                                                                                                                                                   |
|-----------------------------------------------------------------------------------------------------------------------------------------|----------------------------------------------------------------------------------------------------------------------------------|-------------------------------------------------------------------------------------------------------------------------------------------------------------------|
| <p>14. In your last report, what grade did you receive for math ?</p>                                                                   | <p style="text-align: right;">Math  __ __ </p> <p>Not applicable.....00<br/> DON'T KNOW .....98<br/> NO RESPONSE ..... 99</p>    |                                                                                                                                                                   |
| <p><b>IF THE PERSON IS SI LA PERSONA IS IN PREPARATORY OR BACHELORS ASK ABOUT CÁLCULUS OR ÁLGEBRA, WHICH ARE EQUIVALENT TO MATH</b></p> |                                                                                                                                  |                                                                                                                                                                   |
| <p>15. ¿And what about your grade in Spanish?</p>                                                                                       | <p style="text-align: right;">Spanish  __ __ </p> <p>Not applicable.....00<br/> DON'T KNOW .....98<br/> NO RESPONSE ..... 99</p> |                                                                                                                                                                   |
| <p><b>IF THE PERSON IS SI LA PERSONA IS IN PREPARATORY OR BACHELORS ASK ABOUT LITERATURE, WHICH IS EQUIVALENT TO SPANISH</b></p>        |                                                                                                                                  | <p><b>SI LA PERSONA ESTA CURSANDO PREPARATORIA O BACHILLERATO PREGUNTAR SILLEVA LA MATERIA DE CÁLCULO O ÁLGEBRA LAS CUALES SON EQUIVALENTES A MATEMÁTICAS</b></p> |
| <p>16. How many students are there in your classroom?</p>                                                                               | <p style="text-align: right;">Students  __ __ </p> <p>DON'T KNOW .....98<br/> NO RESPONSE ..... 99</p>                           |                                                                                                                                                                   |
| <p>17. How many teachers do you have?</p>                                                                                               | <p style="text-align: right;">Maestros  __ __ </p> <p>DON'T KNOW .....98<br/> NO RESPONSE ..... 99</p>                           |                                                                                                                                                                   |
| <p>18. Do you have the necessary textbooks for this academic year?</p>                                                                  | <p>Yes, all.....1<br/> Yes, some .....2<br/> No .....3<br/> DON'T KNOW .....8<br/> NO RESPONSE .....9</p>                        |                                                                                                                                                                   |
| <p>19. Do your parents help you with your homework?</p>                                                                                 | <p>Yes .....1<br/> No .....2<br/> DON'T KNOW .....8<br/> NO RESPONSE .....9</p>                                                  |                                                                                                                                                                   |
| <p>20. Have you ever stayed back in school?</p>                                                                                         | <p>Yes .....1<br/> No.....2<br/> DON'T KNOW .....8<br/> NO RESPONSE .....9</p>                                                   | <p style="text-align: right;">→ 22</p>                                                                                                                            |

|                                                                                                             |                                                                                                                                                                                                                                                                                                                                                                                             |                                        |
|-------------------------------------------------------------------------------------------------------------|---------------------------------------------------------------------------------------------------------------------------------------------------------------------------------------------------------------------------------------------------------------------------------------------------------------------------------------------------------------------------------------------|----------------------------------------|
| <p>21. Which years did you repeat?</p>                                                                      | <p style="text-align: right;">Times</p> <p><b>Primary</b></p> <p>First ..... 01..... <input type="checkbox"/></p> <p>Second ..... 02..... <input type="checkbox"/></p> <p>Third ..... 03 ..... <input type="checkbox"/></p> <p>Fourth ..... 04 ..... <input type="checkbox"/></p> <p>Fifth ..... 05 ..... <input type="checkbox"/></p> <p>Sixth ..... 06 ..... <input type="checkbox"/></p> |                                        |
| <p style="border: 1px solid black; padding: 2px;">CIRCLE THE CODE(S) AND NOTE THE NUMBER OF TIMES</p>       |                                                                                                                                                                                                                                                                                                                                                                                             |                                        |
|                                                                                                             | <p><b>Secondary</b></p> <p>First ..... 07 ..... <input type="checkbox"/></p> <p>Second ..... 08..... <input type="checkbox"/></p> <p>Third ..... 09..... <input type="checkbox"/></p>                                                                                                                                                                                                       |                                        |
|                                                                                                             | <p><b>Preparatory or bachillerate</b></p> <p>First ..... 10..... <input type="checkbox"/></p> <p>Second ..... 11..... <input type="checkbox"/></p> <p>Third ..... 12..... <input type="checkbox"/></p>                                                                                                                                                                                      |                                        |
|                                                                                                             | <p>DON'T KNOW ..... 98..... <input type="checkbox"/></p> <p>NO RESPONSE ..... 99..... <input type="checkbox"/></p>                                                                                                                                                                                                                                                                          |                                        |
| <p>22. During the <b>last year</b> did you leave school for one month or more while you were inscribed?</p> | <p>Yes ..... 1</p> <p>No..... 2</p> <p>DON'T KNOW ..... 8</p> <p>NO RESPONSE ..... 9</p>                                                                                                                                                                                                                                                                                                    |                                        |
| <p>23. Did you ever not attend in school and then return to school during another year?</p>                 | <p>Yes ..... 1</p> <p>No..... 2</p> <p>DON'T KNOW ..... 8</p> <p>NO RESPONSE ..... 9</p>                                                                                                                                                                                                                                                                                                    |                                        |
| <p>24. How many years were you not signed up for school?</p>                                                | <p style="text-align: right;">Years <input type="text"/> <input type="text"/> <input type="text"/></p> <p>DON'T KNOW ..... 98</p> <p>NO RESPONSE ..... 99</p>                                                                                                                                                                                                                               | <p style="text-align: right;">→ 25</p> |

**II. OCCUPATION** The next questions refer to your daily activities.

|                                                                                                                                                                                     |                                                                                                                                                                                                      |  |
|-------------------------------------------------------------------------------------------------------------------------------------------------------------------------------------|------------------------------------------------------------------------------------------------------------------------------------------------------------------------------------------------------|--|
| <p>25. During the <b>last week</b>, how many hours approximately did you dedicate to household tasks like taking care of children, elderly, or sick people without any payment?</p> | <p style="text-align: right;">Hours <input type="text"/> <input type="text"/> <input type="text"/></p> <p>Don't dedicate any time..... 00</p> <p>DON'T KNOW ..... 98</p> <p>NO RESPONSE ..... 99</p> |  |
|-------------------------------------------------------------------------------------------------------------------------------------------------------------------------------------|------------------------------------------------------------------------------------------------------------------------------------------------------------------------------------------------------|--|

|                                                                                                                                                                       |                                                                                                                                                                                                                                                                                                                      |      |
|-----------------------------------------------------------------------------------------------------------------------------------------------------------------------|----------------------------------------------------------------------------------------------------------------------------------------------------------------------------------------------------------------------------------------------------------------------------------------------------------------------|------|
| <p>26. During the <b>last week</b>, how many hours approximately did you dedicate of offer free services to your community?</p>                                       | <p style="text-align: right;">Hours <input type="text"/> <input type="text"/> <input type="text"/></p> <p>Don't dedicate any time.....00<br/> DON'T KNOW .....98<br/> NO RESPONSE ..... 99</p>                                                                                                                       |      |
| <p>27. During the <b>last week</b>, did you work in exchange for money to support your family or to cover some of your own expenses, at least for one hour?</p>       | <p>Yes .....1<br/> No.....2<br/> DON'T KNOW .....8<br/> NO RESPONSE .....9</p>                                                                                                                                                                                                                                       | → 32 |
| <p>28. Even though you indicated to me that you didn't work in the last week, do you have some other job or employment through yourself? (Are you self-employed?)</p> | <p>Yes .....1<br/> No.....2<br/> DON'T KNOW .....8<br/> NO RESPONSE .....9</p>                                                                                                                                                                                                                                       | → 32 |
| <p>29. <b>Last week</b>, did you work without pay on family/friend's land for a family (or other) business?</p>                                                       | <p>Yes .....1<br/> No.....2<br/> DON'T KNOW .....8<br/> NO RESPONSE .....9</p>                                                                                                                                                                                                                                       |      |
| <p>30. The person that you helped is...</p>                                                                                                                           | <p>A family member? .....1<br/> not a family member? .....2<br/> DON'T KNOW .....8<br/> NO RESPONSE .....9</p>                                                                                                                                                                                                       | → 31 |
| <p>31. Can you tell me how you sustain yourself economically?</p>                                                                                                     | <p>Receive pension for WORK .....1<br/> Receive money from renting a property or from business income .....2<br/> Has savings .....3<br/> Receive pension for widows, divorce, orphan .....4<br/> Has scholarship.....5<br/> A family member or someone else sustains me.....6<br/> Other_____ 7<br/> (specify )</p> | → 32 |
| <div style="border: 1px solid black; padding: 5px; width: fit-content; margin-bottom: 10px;"> <p><b>CIRCLE ALL THAT APPLY</b></p> </div>                              | <div style="border: 1px solid black; padding: 5px; width: fit-content; margin-bottom: 10px;"> <p><b>FOR ALL CASES SKIP TO 41</b></p> </div> <p>NO RESPONSE .....9</p>                                                                                                                                                |      |

|                                                                                                                                                                                                                  |                                                                                                                                                                                                                                                                                                                                                                         | PRIMARY                                                                               | SECONDARY                                                                             | TERTIARY                                                                              |
|------------------------------------------------------------------------------------------------------------------------------------------------------------------------------------------------------------------|-------------------------------------------------------------------------------------------------------------------------------------------------------------------------------------------------------------------------------------------------------------------------------------------------------------------------------------------------------------------------|---------------------------------------------------------------------------------------|---------------------------------------------------------------------------------------|---------------------------------------------------------------------------------------|
| 32. In your<br><b>WORK*</b><br>(...) last<br>week were<br>you ...                                                                                                                                                | Boss?01<br>self-employed? 02<br>work for a commission, percentage ? 03<br>work for a fixed salary? 04<br>member of a cooperative? 05<br>work for a family business without pay? 06<br>work for a business (not family) without pay? 07<br>Other _____<br>(specify in the corresponding column)                                                                          | <br>CODE                                                                              | <br>CODE                                                                              | <br>CODE                                                                              |
| <div style="border: 1px solid black; padding: 2px;"> <p><b>READ ALL OPTIONS AND NOTE THE RESPONSE IN THE CORRESPONDING COLUMN</b></p> <p><b>* READ: PRINCIPAL WORK, SECONDARY WORK, TERTIARY WORK</b></p> </div> | DON'T KNOW 88<br>NO RESPONSE 99                                                                                                                                                                                                                                                                                                                                         |    |    |    |
| 33. What type<br>of work<br>does the<br>business or<br>the boss<br>who you<br>worked for<br>in the past<br>week do?                                                                                              | Agriculture, livestock, fishing, hunting 01<br>Informal Business 02<br>Construction 03<br>Education, Health or Social Services 04<br>Restaurant or hotel 05<br>Formal business (establishment) 06<br>Manufactures 07<br>Transport 08<br>Cultural, sporting , information services 09<br>Other services except government _____<br>(specify in the corresponding column) | <br>CODE                                                                              | <br>CODE                                                                              | <br>CODE                                                                              |
|                                                                                                                                                                                                                  | Government 11<br>DON'T KNOW 98<br>NO RESPONSE 99                                                                                                                                                                                                                                                                                                                        |  |  |  |

34. Last week, how many hours did you work?

**CIRCLE THE DAYS AND NOTE THE TOTAL NUMBER OF HOURS PER DAY**

|  | M    | T    | W    | T    | F    | S    | S    | TOTAL<br>1 | TOTAL<br>2 | TOTAL<br>3 |
|--|------|------|------|------|------|------|------|------------|------------|------------|
|  | <br> | <br> | <br> | <br> | <br> | <br> | <br> | <br>       |            |            |
|  | <br> | <br> | <br> | <br> | <br> | <br> | <br> |            | <br>       |            |
|  | <br> | <br> | <br> | <br> | <br> | <br> | <br> |            |            | <br>       |
|  | <br> | <br> | <br> | <br> | <br> | <br> | <br> | T          | W          | T          |
|  | <br> | <br> | <br> | <br> | <br> | <br> | <br> | <br>       |            |            |
|  | <br> | <br> | <br> | <br> | <br> | <br> | <br> |            | <br>       |            |
|  | <br> | <br> | <br> | <br> | <br> | <br> | <br> |            |            | <br>       |

35. Normally, what days do you work and how many hours do you dedicate to your WORK?



|                                                                                                                                                                                                                                                                                                                                                                                                                                                                                                                                                                                        | WORK                                                                                                           |                                                                                                                |                                                                                                                |
|----------------------------------------------------------------------------------------------------------------------------------------------------------------------------------------------------------------------------------------------------------------------------------------------------------------------------------------------------------------------------------------------------------------------------------------------------------------------------------------------------------------------------------------------------------------------------------------|----------------------------------------------------------------------------------------------------------------|----------------------------------------------------------------------------------------------------------------|----------------------------------------------------------------------------------------------------------------|
|                                                                                                                                                                                                                                                                                                                                                                                                                                                                                                                                                                                        | PRIMARY                                                                                                        | SECONDARY                                                                                                      | TERTIARY                                                                                                       |
| <p>36. In your <b>WORK</b>... from the last week, how much do they pay you and how often do you get paid?</p> <p><b>AMOUNT</b></p> <p>\$98000 o more..... 98000<br/> They pay by service, by piece.<br/> or by finished WORK..... 99000<br/> Did not work last week..... 00000<br/> DON'T KNOW..... 98888<br/> NO RESPONSE..... 99999</p> <p><b>PERIOD</b></p> <p>Every month..... 1<br/> Every 15 days..... 2<br/> Every week..... 3<br/> Daily..... 4<br/> Other period of pay _____ 5<br/> (specify in the corresponding column)<br/> DON'T KNOW..... 8<br/> NO RESPONSE..... 9</p> | <p>\$              </p> <p><b>AMOUNT</b></p> <p>   </p> <p><b>CÓDE</b></p> <p>↓</p> <p><b>OTHER PERIOD</b></p> | <p>\$              </p> <p><b>AMOUNT</b></p> <p>   </p> <p><b>CÓDE</b></p> <p>↓</p> <p><b>OTHER PERIOD</b></p> | <p>\$              </p> <p><b>AMOUNT</b></p> <p>   </p> <p><b>CÓDE</b></p> <p>↓</p> <p><b>OTHER PERIOD</b></p> |
| <p>37. Normally how much do you earn per month for your <b>WORK</b> ...?</p> <p><b>AMOUNT</b></p> <p>\$98000 o más..... 98000<br/> DON'T KNOW..... 98888<br/> NO RESPONSE..... 99999</p>                                                                                                                                                                                                                                                                                                                                                                                               | <p>\$              </p> <p>↓</p> <p><b>AMOUNT</b></p>                                                          | <p>\$              </p> <p>↓</p> <p><b>AMOUNT</b></p>                                                          | <p>\$              </p> <p>↓</p> <p><b>AMOUNT</b></p>                                                          |

The next question applies only to those who answered "they get paid by service, work, piece or completed WORK" in question 36. For the rest, SKIP TO 39.

38. Normally how many **UNITS** (piece, service, work, etc.) Per week are made and sold and how much do you earn ?

**Specify WHAT UNITS ARE PRODUCED OR SOLD**

**UNITS**

9800 or more UNITS ..... 9800  
 DON'T KNOW..... 9888  
 NO RESPONSE ..... 9999

**AMOUNT**

\$98000 or more ..... 98000  
 DON'T KNOW..... 98888  
 NO RESPONSE ..... 99999

| UNITS                     | UNITS                     | UNITS                     |
|---------------------------|---------------------------|---------------------------|
| _____<br><b>AMOUNT</b>    | _____<br><b>AMOUNT</b>    | _____<br><b>AMOUNT</b>    |
| \$ _____<br><b>AMOUNT</b> | \$ _____<br><b>AMOUNT</b> | \$ _____<br><b>AMOUNT</b> |

|                                                                                                                                                                                                                                                                      |                                                                                                                                                                                                                                                                                                                                                                                       | PRINCIPAL                                                                                                        | SECONDAR<br>Y                                                                                                    | TERTIARY                                                                                                                                                                                                                                                       |
|----------------------------------------------------------------------------------------------------------------------------------------------------------------------------------------------------------------------------------------------------------------------|---------------------------------------------------------------------------------------------------------------------------------------------------------------------------------------------------------------------------------------------------------------------------------------------------------------------------------------------------------------------------------------|------------------------------------------------------------------------------------------------------------------|------------------------------------------------------------------------------------------------------------------|----------------------------------------------------------------------------------------------------------------------------------------------------------------------------------------------------------------------------------------------------------------|
| <p>39. In your <b>WORK (...)</b> from <b>last week</b>, how many of the following do you have a right to?</p> <div style="border: 1px solid black; padding: 2px; width: fit-content;"> <p><b>READ ALL OPTIONS AND CIRCLE THE ANSWERS OF THE INFORMANT</b></p> </div> | <p>Aguinaldo ..... 01<br/> Paid vacations ..... 02<br/> Utilities ..... 03<br/> IMSS ..... 04<br/> ISSSTE ..... 05<br/> SAR (Retirement savings system) ..... 06<br/> Living Credit ..... 07<br/> Private Health Insurance ..... 08<br/> Other _____ 09<br/> (specify en la columna correspondiente)</p> <p>DON'T KNOW ..... 98<br/> NO RESPONSE ..... 99</p> <p>Ninguno ..... 00</p> | <p>01<br/>02<br/>03<br/>04<br/>05<br/>06<br/>07<br/>08<br/>09</p> <p style="text-align: center;">↓</p> <p>00</p> | <p>01<br/>02<br/>03<br/>04<br/>05<br/>06<br/>07<br/>08<br/>09</p> <p style="text-align: center;">↓</p> <p>00</p> | <p>01<br/>02<br/>03<br/>04<br/>05<br/>06<br/>07<br/>08<br/>09</p> <p style="text-align: center;">00</p> <div style="border: 1px solid black; padding: 2px; width: fit-content; margin-left: auto; margin-right: auto;"> <p><b>SKIP TO 41<br/>41</b></p> </div> |
| <p>40. Besides the <b>WORK (...)</b> that we have already talked about Did you have any other work during the last <b>week?</b></p>                                                                                                                                  | <div style="border: 1px solid black; padding: 2px; width: fit-content; margin-bottom: 5px;"> <p><b>NOTE THE CODE IN THE BOX</b></p> </div> <p>Yes ..... 1<br/> No ..... 2<br/> DON'T KNOW ..... 8<br/> NO RESPONSE ..... 9</p>                                                                                                                                                        | <p style="text-align: center;">   <br/>CODE</p> <p><b>→Return to 32</b></p>                                      | <p style="text-align: center;">   <br/>CODE</p> <p><b>→Return to 32</b></p>                                      |                                                                                                                                                                                                                                                                |

**III. UTILIZATION OF HEALTH SERVICES**

|                                                                                                                                                                                                                                                                                                                                                                                                                                   |                                                                                                                                                                                                                                                                                                                                                                                                                                                                                                                                                         |                                                                                                                                                                                                                                                                 |                                                                                                                                                                                                                                                                                                                                                                                                                                                          |                                                                                                                                                                                                                                                                                                                                                                                                                                                             |
|-----------------------------------------------------------------------------------------------------------------------------------------------------------------------------------------------------------------------------------------------------------------------------------------------------------------------------------------------------------------------------------------------------------------------------------|---------------------------------------------------------------------------------------------------------------------------------------------------------------------------------------------------------------------------------------------------------------------------------------------------------------------------------------------------------------------------------------------------------------------------------------------------------------------------------------------------------------------------------------------------------|-----------------------------------------------------------------------------------------------------------------------------------------------------------------------------------------------------------------------------------------------------------------|----------------------------------------------------------------------------------------------------------------------------------------------------------------------------------------------------------------------------------------------------------------------------------------------------------------------------------------------------------------------------------------------------------------------------------------------------------|-------------------------------------------------------------------------------------------------------------------------------------------------------------------------------------------------------------------------------------------------------------------------------------------------------------------------------------------------------------------------------------------------------------------------------------------------------------|
| <p>41. In the past four weeks, Did you go to ...</p> <p>Yes ..... 1<br/>                 No..... 2<br/>                 DOESN'T KNOW ..... 8<br/>                 NO RESPONSE ..... 9</p> <div style="border: 1px solid black; padding: 2px; width: fit-content; margin: 5px 0;">ASK FOR EACH SERVICE OR SKIP TO 51</div> <p style="text-align: center; margin: 10px 0;">→</p> <p style="text-align: center; margin: 0;">CODE</p> | <p>42. What type of insitution does (TYPE OFSERVICE) belong to?</p> <p>Secretary of Health (SSA) ..... 1<br/>                 IMSS ..... 2<br/>                 IMSS Solidaridad ..... 3<br/>                 ISSSTE ..... 4<br/>                 Gobierno municipal ..... 5<br/>                 Dispensario ..... 6<br/>                 Otros ..... 7<br/>                 DOESN'T KNOW ..... 8<br/>                 NO RESPONSE ..... 9</p> <p style="text-align: center; margin: 10px 0;">→</p> <p style="text-align: center; margin: 0;">CODE</p> | <p>43. In the last four weeks, how many times did you go to (TYPE OF SERVICE)?</p> <p>DOESN'T KNOW ....98<br/>                 NO RESPONSE .....99</p> <p style="text-align: center; margin: 10px 0;">→</p> <p style="text-align: center; margin: 0;">TIMES</p> | <p>44. How much was paid for the service recieved at (TYPE OF SERVICE)?</p> <div style="border: 1px solid black; padding: 2px; width: fit-content; margin: 5px 0;">INSIST TO OBTAIN AN ANSWER IN PESOS</div> <p>Nothing ....0000</p> <p>They billed in piece .....0001</p> <p>\$ 9800 or more98</p> <p>DON'T KNOW98</p> <p>NO RESPONSE9999</p> <p style="text-align: center; margin: 10px 0;">→</p> <p style="text-align: center; margin: 0;">AMOUNT</p> | <p>45. Did you or anyone in the household work in exchange for service or pay in kind for the attention received at (TYPE OF SERVICE)?</p> <p>Yes..... 1<br/>                 No ..... 2<br/>                 DOESN'T KNOW 8</p> <p style="text-align: center; margin: 10px 0;">NO</p> <p style="text-align: center; margin: 0;">→</p> <div style="border: 1px solid black; padding: 2px; width: fit-content; margin: 5px 0;">SKIP TO 48 RESPONSE.. 9</div> |
|-----------------------------------------------------------------------------------------------------------------------------------------------------------------------------------------------------------------------------------------------------------------------------------------------------------------------------------------------------------------------------------------------------------------------------------|---------------------------------------------------------------------------------------------------------------------------------------------------------------------------------------------------------------------------------------------------------------------------------------------------------------------------------------------------------------------------------------------------------------------------------------------------------------------------------------------------------------------------------------------------------|-----------------------------------------------------------------------------------------------------------------------------------------------------------------------------------------------------------------------------------------------------------------|----------------------------------------------------------------------------------------------------------------------------------------------------------------------------------------------------------------------------------------------------------------------------------------------------------------------------------------------------------------------------------------------------------------------------------------------------------|-------------------------------------------------------------------------------------------------------------------------------------------------------------------------------------------------------------------------------------------------------------------------------------------------------------------------------------------------------------------------------------------------------------------------------------------------------------|

|                                                      |         |   |     |             |         |
|------------------------------------------------------|---------|---|-----|-------------|---------|
| a hospital for consultation (NOT TO STAY OVERNIGHT)? | 1 2 8 9 | _ | _ _ | \$  _ _ _ _ | 1 2 8 9 |
| a clinic or health center?                           | 1 2 8 9 | _ | _ _ | \$  _ _ _ _ | 1 2 8 9 |
| a private practice or specialist?                    | 1 2 8 9 |   | _ _ | \$  _ _ _ _ | 1 2 8 9 |
| a midwife or health assistant?                       | 1 2 8 9 |   | _ _ | \$  _ _ _ _ | 1 2 8 9 |
| an herbalist, traditional medicine doctor?           | 1 2 8 9 |   | _ _ | \$  _ _ _ _ | 1 2 8 9 |
| a pharmacy?                                          | 1 2 8 9 |   | _ _ | \$  _ _ _ _ | 1 2 8 9 |

III. UTILIZATION OF HEALTH SERVICES

| <p>46. .... How much time did the work last for payment of (TYPE DE SERVICIO)?</p> <p>Did not work ..... 00<br/>                     DON'T KNOW ..... 98<br/>                     NO RESPONSE ..... 99</p> <p>→</p> <p>HOURS</p> | <p>47. How much do you estimate the payment in kind to be for (TYPE OF SERVICE)?</p> <p>Did not pay in kind..... 000<br/>                     DON'T KNOW ..... 988<br/>                     NO RESPONSE ..... 999</p> <p>→</p> <p>AMOUNT</p> | <p>48. The payment in cash, in kind, or in work that was made for (TYPE OF SERVICE), did it include prescribed medicine?</p> <p>No ..... 2<br/>                     Yes..... 1<br/>                     Nothing was prescribed<br/>                     DON'T KNOW..... 8<br/>                     NO RESPONSE ..9</p> <p>→</p> <p>SKIP TO 50</p> | <p>49. How much was paid for the prescribed medicine for (TYPE OF SERVICE)?</p> <p>INSIST TO OBTAIN A RESPONSE IN PESOS<br/>                     Nothing .....000<br/>                     \$ 980 or more980<br/>                     DON'T KNOW988<br/>                     NO RESPONSE999</p> <p>→</p> <p>AMOUNT</p> | <p>50. How much was spent on the roundtrip trip to (TYPE OF SERVICE)?</p> <p>INSIST TO OBTAIN A RESPONSE IN PESOS<br/>                     Nothing..... . 000<br/>                     \$ 980 or more.....980<br/>                     DON'T KNOW....988<br/>                     NO RESPONSE...999</p> <p>↓</p> <p>SKIP TO THE NEXT SERVICE</p> <p>AMOUNT</p> |
|----------------------------------------------------------------------------------------------------------------------------------------------------------------------------------------------------------------------------------|----------------------------------------------------------------------------------------------------------------------------------------------------------------------------------------------------------------------------------------------|---------------------------------------------------------------------------------------------------------------------------------------------------------------------------------------------------------------------------------------------------------------------------------------------------------------------------------------------------|------------------------------------------------------------------------------------------------------------------------------------------------------------------------------------------------------------------------------------------------------------------------------------------------------------------------|----------------------------------------------------------------------------------------------------------------------------------------------------------------------------------------------------------------------------------------------------------------------------------------------------------------------------------------------------------------|
| <p>     _ _ </p>                                                                                                                                                                                                                 | <p>\$  _ _ _ </p>                                                                                                                                                                                                                            | <p>1 2 3 8 9</p>                                                                                                                                                                                                                                                                                                                                  | <p>\$  _ _ _ </p>                                                                                                                                                                                                                                                                                                      | <p>\$  _ _ _ </p>                                                                                                                                                                                                                                                                                                                                              |
| <p>     _ _ </p>                                                                                                                                                                                                                 | <p>\$  _ _ _ </p>                                                                                                                                                                                                                            | <p>1 2 3 8 9</p>                                                                                                                                                                                                                                                                                                                                  | <p>\$  _ _ _ </p>                                                                                                                                                                                                                                                                                                      | <p>\$  _ _ _ </p>                                                                                                                                                                                                                                                                                                                                              |
| <p>     _ _ </p>                                                                                                                                                                                                                 | <p>\$  _ _ _ </p>                                                                                                                                                                                                                            | <p>1 2 3 8 9</p>                                                                                                                                                                                                                                                                                                                                  | <p>\$  _ _ _ </p>                                                                                                                                                                                                                                                                                                      | <p>\$  _ _ _ </p>                                                                                                                                                                                                                                                                                                                                              |
| <p>     _ _ </p>                                                                                                                                                                                                                 | <p>\$  _ _ _ </p>                                                                                                                                                                                                                            | <p>1 2 3 8 9</p>                                                                                                                                                                                                                                                                                                                                  | <p>\$  _ _ _ </p>                                                                                                                                                                                                                                                                                                      | <p>\$  _ _ _ </p>                                                                                                                                                                                                                                                                                                                                              |
| <p>     _ _ </p>                                                                                                                                                                                                                 | <p>\$  _ _ _ </p>                                                                                                                                                                                                                            | <p>1 2 3 8 9</p>                                                                                                                                                                                                                                                                                                                                  | <p>\$  _ _ _ </p>                                                                                                                                                                                                                                                                                                      | <p>\$  _ _ _ </p>                                                                                                                                                                                                                                                                                                                                              |
| <p>     _ _ </p>                                                                                                                                                                                                                 | <p>\$  _ _ _ </p>                                                                                                                                                                                                                            | <p>1 2 3 8 9</p>                                                                                                                                                                                                                                                                                                                                  | <p>\$  _ _ _ </p>                                                                                                                                                                                                                                                                                                      | <p>\$  _ _ _ </p>                                                                                                                                                                                                                                                                                                                                              |

|  |  |  |  |  |
|--|--|--|--|--|
|  |  |  |  |  |
|--|--|--|--|--|

**IV. UTILIZATION OF HOSPITALS**

**SKIP TO**

51. In the last year, did you stay at the hospital for one or more days?
- Yes ..... 1
  - No ..... 2
  - DOESN'T KNOW ..... 8
  - NO RESPONSE ..... 9

**→55**

**CIRCLE ALL THAT APPLY**

52. The place where you were hospitalized, what type of institution did it belong to?
- Secretary of Health (SSA)..... 01
  - IMSS ..... 02
  - IMSS Solidaridad ..... 03
  - ISSSTE ..... 04
  - Municipal Government ..... 05
  - Private Institution ..... 06
  - Dispensary ..... 07
  - Other type of institution?  
\_\_\_\_\_ 08  
(specify)
  - DON'T KNOW ..... 98
  - NO RESPONSE..... 99

53. In total, how many days were you hospitalized during the whole year?
- DAYS** |\_\_|\_\_|\_\_|
- DOESN'T KNOW ..... 988
  - NO RESPONSE ..... 999

54. What was the total expense for the hospitalization?
- AMOUNT \$** |\_\_|\_\_|\_\_|\_\_|
- Did not spend anything ..... 00000
  - \$98000 or more..... 98000
  - DOESN'T KNOW ..... 98888
  - NO RESPONSE..... 99999

**AFT ER THIS SECTION, THE FOLLOWING SECTION ONLY APPLIES TO THE PRIMARY INFORMANT  
THANK ALL OTHERS AND FINISH UP WITH THEM**

**V. WELLNESS**

**SKIP TO**

Now I am going to ask you some questions about how you feel about various aspects in your life.

|                                                                         |                        |
|-------------------------------------------------------------------------|------------------------|
| 55. Compared to the past, how happy do you feel with your present life? | Not very happy ..... 1 |
|                                                                         | Happy enough..... 2    |
| <b>READ ALOUD ALL OPTIONS</b>                                           | Very happy ..... 3     |
|                                                                         | NO RESPONSE ..... 9    |

|                                                                                                          |                              |
|----------------------------------------------------------------------------------------------------------|------------------------------|
| 56. In case of crisis (anything that could alter your life), how capable do you feel of dealing with it? | Not capable at all ..... 1   |
|                                                                                                          | Up to a certain point..... 2 |
|                                                                                                          | Very capable ..... 3         |
| <b>READ ALOUD ALL OPTIONS</b>                                                                            | NO RESPONSE..... 9           |

|                                                                              |                              |
|------------------------------------------------------------------------------|------------------------------|
| 57. How worried do you get about the relationship you have with your family? | A little ..... 1             |
|                                                                              | Up to a certain point..... 2 |
| <b>READ ALOUD ALL OPTIONS</b>                                                | A lot ..... 3                |
|                                                                              | NO RESPONSE..... 9           |

|                                                            |                                    |
|------------------------------------------------------------|------------------------------------|
| 58. Do you feel capable of responding to your obligations? | Yes, all my obligations ..... 1    |
|                                                            | Some of my obligations..... 2      |
|                                                            | No, none of my obligations ..... 3 |
|                                                            | NO RESPONSE ..... 9                |

|                                                                                               |                     |
|-----------------------------------------------------------------------------------------------|---------------------|
| 59. Is there someone you can depend on for everything including personal and intimate issues? | Yes ..... 1         |
|                                                                                               | No ..... 2          |
|                                                                                               | DON'T KNOW ..... 8  |
|                                                                                               | NO RESPONSE ..... 9 |



| VI. VIOLENCE AND AGGRESSION                                                                                                                                                                 |                                                                                                                                                                                                                                                                       | SKIP TO             |
|---------------------------------------------------------------------------------------------------------------------------------------------------------------------------------------------|-----------------------------------------------------------------------------------------------------------------------------------------------------------------------------------------------------------------------------------------------------------------------|---------------------|
| 60. Have you had any problems related to robbery, intimidation, aggression, or violence in the past 12?                                                                                     | Yes ..... 1<br>No ..... 2<br>NO RESPONSE ..... 9                                                                                                                                                                                                                      | ]<br><br><b>→65</b> |
| <div style="border: 1px solid black; padding: 2px;"> <b>IF THE ANSWER IS NO OR NO RESPONSE: FOR WOMEN 12 AND OLDER SKIP TO 65. FOR ALL OTHERS SKIP TO 87</b> </div>                         |                                                                                                                                                                                                                                                                       |                     |
| 61. What happened?                                                                                                                                                                          | Robbery, assault ..... 1<br>Aggression without any apparent motive ..... 2<br>Kidnapping ..... 3<br>Detention ..... 4<br>Discussion/altercation ..... 5<br>Sexual aggression ..... 6<br>Other ..... 7<br>_____ (specify)<br>DON'T KNOW ..... 8<br>NO RESPONSE ..... 9 |                     |
| <div style="border: 1px solid black; padding: 2px;"> <b>IF THERE IS MORE THAN ONE, REFER TO THE LAST ONE MENTIONED FOR THE FOLLOWING QUESTIONS</b><br/><br/> <b>T LAST ONE FOR T</b> </div> |                                                                                                                                                                                                                                                                       |                     |
| 62. Where were you when it (MENTION THE VIOLENCE) happened?                                                                                                                                 | Home ..... 1<br>School ..... 2<br>Work ..... 3<br>Public area ..... 4<br>Countryside ..... 5<br>Sporting facility ..... 6<br>Commercial establishment ..... 7<br>Other ..... 8<br>_____ (specify)<br>NO RESPONSE ..... 9                                              |                     |
| 63. Did you know the person/ people who hurt you?                                                                                                                                           | Yes ..... 1<br>No ..... 2<br>I don't know ..... 3<br>NO RESPONSE ..... 9                                                                                                                                                                                              |                     |
| 64. <b>INTERVIEWER: Were there other people present during the interview of this section?</b>                                                                                               | Yes ..... 1<br>Code      <br>Code      <br>Code      <br>Code      <br>No ..... 2<br>Another person that is not a part of this household ..... 6                                                                                                                      |                     |
| <div style="border: 1px solid black; padding: 2px;"> <b>CIRCLE THE ANSWER AND IF THE ANSWER IS YES, WRITE THEIR NUMBER IN THE SPACE</b> </div>                                              |                                                                                                                                                                                                                                                                       |                     |
| <b>THE FOLLOWING QUESTIONS ARE ONLY FOR WOMEN 12 YEARS AND OLDER. FOR ALL OTHER, PLEASE SKIP TO 87</b>                                                                                      |                                                                                                                                                                                                                                                                       |                     |
| VII. REPRODUCTIVE HEALTH                                                                                                                                                                    |                                                                                                                                                                                                                                                                       | SKIP TO             |

| VII. REPRODUCTIVE HEALTH                                                                                                          |                                                                                                                                                                                                                    | SKIP TO           |
|-----------------------------------------------------------------------------------------------------------------------------------|--------------------------------------------------------------------------------------------------------------------------------------------------------------------------------------------------------------------|-------------------|
| 65. Have you ever been pregnant?                                                                                                  | Yes ..... 1<br>No ..... 2<br>NO RESPONSE ..... 9                                                                                                                                                                   | ]<br>→ 87         |
| 66. How many times have you been pregnant?                                                                                        | Number of times  __ __ <br>DOESN'T KNOW ..... 98<br>NO RESPONSE ..... 99                                                                                                                                           |                   |
| 67. Have any of your children died?                                                                                               | Yes ..... 1<br>Number of children that have died  __ __ <br>No ..... 2<br>NO RESPONSE ..... 9                                                                                                                      |                   |
| <div style="border: 1px solid black; padding: 2px;">CIRCLE THE ANSWER AND IF YES, ASK: HOW MANY OF YOUR CHILDREN HAVE DIED?</div> |                                                                                                                                                                                                                    |                   |
| 68. Are you currently pregnant?                                                                                                   | Yes ..... 1<br>No ..... 2<br>DOESN'T KNOW ..... 3<br>NO RESPONSE ..... 4                                                                                                                                           | → 87              |
| 69. Have you been pregnant in the past 12 months?                                                                                 | Yes ..... 1<br>No ..... 2<br>DOESN'T KNOW ..... 8<br>NO RESPONSE ..... 9                                                                                                                                           | → 87              |
| 70. During this pregnancy, who examined you?                                                                                      | Doctor ..... 1<br>Nurse ..... 2<br>Midwife ..... 3<br>Community worker ..... 4<br>Health promoter ..... 5<br>Family or friend ..... 6<br>No one ..... 7<br>Other ..... 8<br>_____ (Specify)<br>NO RESPONSE ..... 9 | ]<br>→ 75<br>→ 75 |
| <div style="border: 1px solid black; padding: 2px;">CIRCLE ALL THAT APPLY</div>                                                   |                                                                                                                                                                                                                    |                   |

| <p>71. Where did you get your first check up for this pregnancy?</p>                                                                                                           | <p><b>IMSS</b></p> <ul style="list-style-type: none"> <li>- Clinic or Hospital ..... 01</li> <li>- Clinic Solidaridad ..... 02</li> </ul> <p><b>SSA</b></p> <ul style="list-style-type: none"> <li>- Health Center or Hospital ..... 03</li> <li>- Auxiliar de Salud ..... 04</li> </ul> <p><b>ISSSTE</b> ..... 05</p> <p><b>DIF</b> ..... 06</p> <p>Other government institutions ..... 07</p> <p>Clinic or Private Hospital ..... 08</p> <p>Home of midwife ..... 09</p> <p>Woman's home ..... 10</p> <p>Other</p> <p>_____ 11</p> <p style="text-align: center;">(specify)</p> <p>NO RESPONSE ..... 99</p>                                                                                                                                                                                                                                                                                                                                                                                                                                                                                                                                                                                                                                                                                                                                                                                                                                                                                                                                                                                                                                                                                                                                                                                                                                                                                                                                                                                                                                                                                                                                                                                                                                                                                         |    |     |    |    |    |                                          |   |   |   |   |                      |  |  |  |  |              |   |   |   |   |           |   |   |   |   |                              |   |   |   |   |                     |   |   |   |   |                     |  |  |  |  |                |   |   |   |   |                                |  |  |  |  |                  |   |   |   |   |                                                             |   |   |   |   |  |
|--------------------------------------------------------------------------------------------------------------------------------------------------------------------------------|-------------------------------------------------------------------------------------------------------------------------------------------------------------------------------------------------------------------------------------------------------------------------------------------------------------------------------------------------------------------------------------------------------------------------------------------------------------------------------------------------------------------------------------------------------------------------------------------------------------------------------------------------------------------------------------------------------------------------------------------------------------------------------------------------------------------------------------------------------------------------------------------------------------------------------------------------------------------------------------------------------------------------------------------------------------------------------------------------------------------------------------------------------------------------------------------------------------------------------------------------------------------------------------------------------------------------------------------------------------------------------------------------------------------------------------------------------------------------------------------------------------------------------------------------------------------------------------------------------------------------------------------------------------------------------------------------------------------------------------------------------------------------------------------------------------------------------------------------------------------------------------------------------------------------------------------------------------------------------------------------------------------------------------------------------------------------------------------------------------------------------------------------------------------------------------------------------------------------------------------------------------------------------------------------------|----|-----|----|----|----|------------------------------------------|---|---|---|---|----------------------|--|--|--|--|--------------|---|---|---|---|-----------|---|---|---|---|------------------------------|---|---|---|---|---------------------|---|---|---|---|---------------------|--|--|--|--|----------------|---|---|---|---|--------------------------------|--|--|--|--|------------------|---|---|---|---|-------------------------------------------------------------|---|---|---|---|--|
| <p>72. In what month of your pregnancy did you have a checkup for the first time?</p>                                                                                          | <p style="text-align: right;">Month  __ __ </p> <p>DOESN'T KNOW ..... 98</p> <p>NO RESPONSE ..... 99</p>                                                                                                                                                                                                                                                                                                                                                                                                                                                                                                                                                                                                                                                                                                                                                                                                                                                                                                                                                                                                                                                                                                                                                                                                                                                                                                                                                                                                                                                                                                                                                                                                                                                                                                                                                                                                                                                                                                                                                                                                                                                                                                                                                                                              |    |     |    |    |    |                                          |   |   |   |   |                      |  |  |  |  |              |   |   |   |   |           |   |   |   |   |                              |   |   |   |   |                     |   |   |   |   |                     |  |  |  |  |                |   |   |   |   |                                |  |  |  |  |                  |   |   |   |   |                                                             |   |   |   |   |  |
| <p>73. How many times in total did you have check ups during this pregnancy?</p>                                                                                               | <p style="text-align: right;">NUMBER OF TIMES  __ __ </p> <p>DOESN'T KNOW ..... 98</p> <p>NO RESPONSE ..... 99</p>                                                                                                                                                                                                                                                                                                                                                                                                                                                                                                                                                                                                                                                                                                                                                                                                                                                                                                                                                                                                                                                                                                                                                                                                                                                                                                                                                                                                                                                                                                                                                                                                                                                                                                                                                                                                                                                                                                                                                                                                                                                                                                                                                                                    |    |     |    |    |    |                                          |   |   |   |   |                      |  |  |  |  |              |   |   |   |   |           |   |   |   |   |                              |   |   |   |   |                     |   |   |   |   |                     |  |  |  |  |                |   |   |   |   |                                |  |  |  |  |                  |   |   |   |   |                                                             |   |   |   |   |  |
| <p>74. During the revisions...</p> <div style="border: 1px solid black; padding: 2px; margin-top: 10px; text-align: center;"> <p><b>READ EACH OPTION AND CIRCLE</b></p> </div> | <table style="width: 100%; border-collapse: collapse;"> <thead> <tr> <th style="width: 60%;"></th> <th style="width: 10%; text-align: center;">Yes</th> <th style="width: 10%; text-align: center;">No</th> <th style="width: 10%; text-align: center;">DN</th> <th style="width: 10%; text-align: center;">NR</th> </tr> </thead> <tbody> <tr> <td>Did they give you a vaccine for tetanus?</td> <td style="text-align: center;">1</td> <td style="text-align: center;">2</td> <td style="text-align: center;">8</td> <td style="text-align: center;">9</td> </tr> <tr> <td>Did they prescribe :</td> <td></td> <td></td> <td></td> <td></td> </tr> <tr> <td>iron pills ?</td> <td style="text-align: center;">1</td> <td style="text-align: center;">2</td> <td style="text-align: center;">8</td> <td style="text-align: center;">9</td> </tr> <tr> <td>vitamins?</td> <td style="text-align: center;">1</td> <td style="text-align: center;">2</td> <td style="text-align: center;">8</td> <td style="text-align: center;">9</td> </tr> <tr> <td>Did they take your pressure?</td> <td style="text-align: center;">1</td> <td style="text-align: center;">2</td> <td style="text-align: center;">8</td> <td style="text-align: center;">9</td> </tr> <tr> <td>Did they weigh you?</td> <td style="text-align: center;">1</td> <td style="text-align: center;">2</td> <td style="text-align: center;">8</td> <td style="text-align: center;">9</td> </tr> <tr> <td>Did they recommend:</td> <td></td> <td></td> <td></td> <td></td> </tr> <tr> <td>breastfeeding?</td> <td style="text-align: center;">1</td> <td style="text-align: center;">2</td> <td style="text-align: center;">8</td> <td style="text-align: center;">9</td> </tr> <tr> <td>Did they speak with you about:</td> <td></td> <td></td> <td></td> <td></td> </tr> <tr> <td>family planning?</td> <td style="text-align: center;">1</td> <td style="text-align: center;">2</td> <td style="text-align: center;">8</td> <td style="text-align: center;">9</td> </tr> <tr> <td>Did they offer any contraceptives for after you give birth?</td> <td style="text-align: center;">1</td> <td style="text-align: center;">2</td> <td style="text-align: center;">8</td> <td style="text-align: center;">9</td> </tr> </tbody> </table> |    | Yes | No | DN | NR | Did they give you a vaccine for tetanus? | 1 | 2 | 8 | 9 | Did they prescribe : |  |  |  |  | iron pills ? | 1 | 2 | 8 | 9 | vitamins? | 1 | 2 | 8 | 9 | Did they take your pressure? | 1 | 2 | 8 | 9 | Did they weigh you? | 1 | 2 | 8 | 9 | Did they recommend: |  |  |  |  | breastfeeding? | 1 | 2 | 8 | 9 | Did they speak with you about: |  |  |  |  | family planning? | 1 | 2 | 8 | 9 | Did they offer any contraceptives for after you give birth? | 1 | 2 | 8 | 9 |  |
|                                                                                                                                                                                | Yes                                                                                                                                                                                                                                                                                                                                                                                                                                                                                                                                                                                                                                                                                                                                                                                                                                                                                                                                                                                                                                                                                                                                                                                                                                                                                                                                                                                                                                                                                                                                                                                                                                                                                                                                                                                                                                                                                                                                                                                                                                                                                                                                                                                                                                                                                                   | No | DN  | NR |    |    |                                          |   |   |   |   |                      |  |  |  |  |              |   |   |   |   |           |   |   |   |   |                              |   |   |   |   |                     |   |   |   |   |                     |  |  |  |  |                |   |   |   |   |                                |  |  |  |  |                  |   |   |   |   |                                                             |   |   |   |   |  |
| Did they give you a vaccine for tetanus?                                                                                                                                       | 1                                                                                                                                                                                                                                                                                                                                                                                                                                                                                                                                                                                                                                                                                                                                                                                                                                                                                                                                                                                                                                                                                                                                                                                                                                                                                                                                                                                                                                                                                                                                                                                                                                                                                                                                                                                                                                                                                                                                                                                                                                                                                                                                                                                                                                                                                                     | 2  | 8   | 9  |    |    |                                          |   |   |   |   |                      |  |  |  |  |              |   |   |   |   |           |   |   |   |   |                              |   |   |   |   |                     |   |   |   |   |                     |  |  |  |  |                |   |   |   |   |                                |  |  |  |  |                  |   |   |   |   |                                                             |   |   |   |   |  |
| Did they prescribe :                                                                                                                                                           |                                                                                                                                                                                                                                                                                                                                                                                                                                                                                                                                                                                                                                                                                                                                                                                                                                                                                                                                                                                                                                                                                                                                                                                                                                                                                                                                                                                                                                                                                                                                                                                                                                                                                                                                                                                                                                                                                                                                                                                                                                                                                                                                                                                                                                                                                                       |    |     |    |    |    |                                          |   |   |   |   |                      |  |  |  |  |              |   |   |   |   |           |   |   |   |   |                              |   |   |   |   |                     |   |   |   |   |                     |  |  |  |  |                |   |   |   |   |                                |  |  |  |  |                  |   |   |   |   |                                                             |   |   |   |   |  |
| iron pills ?                                                                                                                                                                   | 1                                                                                                                                                                                                                                                                                                                                                                                                                                                                                                                                                                                                                                                                                                                                                                                                                                                                                                                                                                                                                                                                                                                                                                                                                                                                                                                                                                                                                                                                                                                                                                                                                                                                                                                                                                                                                                                                                                                                                                                                                                                                                                                                                                                                                                                                                                     | 2  | 8   | 9  |    |    |                                          |   |   |   |   |                      |  |  |  |  |              |   |   |   |   |           |   |   |   |   |                              |   |   |   |   |                     |   |   |   |   |                     |  |  |  |  |                |   |   |   |   |                                |  |  |  |  |                  |   |   |   |   |                                                             |   |   |   |   |  |
| vitamins?                                                                                                                                                                      | 1                                                                                                                                                                                                                                                                                                                                                                                                                                                                                                                                                                                                                                                                                                                                                                                                                                                                                                                                                                                                                                                                                                                                                                                                                                                                                                                                                                                                                                                                                                                                                                                                                                                                                                                                                                                                                                                                                                                                                                                                                                                                                                                                                                                                                                                                                                     | 2  | 8   | 9  |    |    |                                          |   |   |   |   |                      |  |  |  |  |              |   |   |   |   |           |   |   |   |   |                              |   |   |   |   |                     |   |   |   |   |                     |  |  |  |  |                |   |   |   |   |                                |  |  |  |  |                  |   |   |   |   |                                                             |   |   |   |   |  |
| Did they take your pressure?                                                                                                                                                   | 1                                                                                                                                                                                                                                                                                                                                                                                                                                                                                                                                                                                                                                                                                                                                                                                                                                                                                                                                                                                                                                                                                                                                                                                                                                                                                                                                                                                                                                                                                                                                                                                                                                                                                                                                                                                                                                                                                                                                                                                                                                                                                                                                                                                                                                                                                                     | 2  | 8   | 9  |    |    |                                          |   |   |   |   |                      |  |  |  |  |              |   |   |   |   |           |   |   |   |   |                              |   |   |   |   |                     |   |   |   |   |                     |  |  |  |  |                |   |   |   |   |                                |  |  |  |  |                  |   |   |   |   |                                                             |   |   |   |   |  |
| Did they weigh you?                                                                                                                                                            | 1                                                                                                                                                                                                                                                                                                                                                                                                                                                                                                                                                                                                                                                                                                                                                                                                                                                                                                                                                                                                                                                                                                                                                                                                                                                                                                                                                                                                                                                                                                                                                                                                                                                                                                                                                                                                                                                                                                                                                                                                                                                                                                                                                                                                                                                                                                     | 2  | 8   | 9  |    |    |                                          |   |   |   |   |                      |  |  |  |  |              |   |   |   |   |           |   |   |   |   |                              |   |   |   |   |                     |   |   |   |   |                     |  |  |  |  |                |   |   |   |   |                                |  |  |  |  |                  |   |   |   |   |                                                             |   |   |   |   |  |
| Did they recommend:                                                                                                                                                            |                                                                                                                                                                                                                                                                                                                                                                                                                                                                                                                                                                                                                                                                                                                                                                                                                                                                                                                                                                                                                                                                                                                                                                                                                                                                                                                                                                                                                                                                                                                                                                                                                                                                                                                                                                                                                                                                                                                                                                                                                                                                                                                                                                                                                                                                                                       |    |     |    |    |    |                                          |   |   |   |   |                      |  |  |  |  |              |   |   |   |   |           |   |   |   |   |                              |   |   |   |   |                     |   |   |   |   |                     |  |  |  |  |                |   |   |   |   |                                |  |  |  |  |                  |   |   |   |   |                                                             |   |   |   |   |  |
| breastfeeding?                                                                                                                                                                 | 1                                                                                                                                                                                                                                                                                                                                                                                                                                                                                                                                                                                                                                                                                                                                                                                                                                                                                                                                                                                                                                                                                                                                                                                                                                                                                                                                                                                                                                                                                                                                                                                                                                                                                                                                                                                                                                                                                                                                                                                                                                                                                                                                                                                                                                                                                                     | 2  | 8   | 9  |    |    |                                          |   |   |   |   |                      |  |  |  |  |              |   |   |   |   |           |   |   |   |   |                              |   |   |   |   |                     |   |   |   |   |                     |  |  |  |  |                |   |   |   |   |                                |  |  |  |  |                  |   |   |   |   |                                                             |   |   |   |   |  |
| Did they speak with you about:                                                                                                                                                 |                                                                                                                                                                                                                                                                                                                                                                                                                                                                                                                                                                                                                                                                                                                                                                                                                                                                                                                                                                                                                                                                                                                                                                                                                                                                                                                                                                                                                                                                                                                                                                                                                                                                                                                                                                                                                                                                                                                                                                                                                                                                                                                                                                                                                                                                                                       |    |     |    |    |    |                                          |   |   |   |   |                      |  |  |  |  |              |   |   |   |   |           |   |   |   |   |                              |   |   |   |   |                     |   |   |   |   |                     |  |  |  |  |                |   |   |   |   |                                |  |  |  |  |                  |   |   |   |   |                                                             |   |   |   |   |  |
| family planning?                                                                                                                                                               | 1                                                                                                                                                                                                                                                                                                                                                                                                                                                                                                                                                                                                                                                                                                                                                                                                                                                                                                                                                                                                                                                                                                                                                                                                                                                                                                                                                                                                                                                                                                                                                                                                                                                                                                                                                                                                                                                                                                                                                                                                                                                                                                                                                                                                                                                                                                     | 2  | 8   | 9  |    |    |                                          |   |   |   |   |                      |  |  |  |  |              |   |   |   |   |           |   |   |   |   |                              |   |   |   |   |                     |   |   |   |   |                     |  |  |  |  |                |   |   |   |   |                                |  |  |  |  |                  |   |   |   |   |                                                             |   |   |   |   |  |
| Did they offer any contraceptives for after you give birth?                                                                                                                    | 1                                                                                                                                                                                                                                                                                                                                                                                                                                                                                                                                                                                                                                                                                                                                                                                                                                                                                                                                                                                                                                                                                                                                                                                                                                                                                                                                                                                                                                                                                                                                                                                                                                                                                                                                                                                                                                                                                                                                                                                                                                                                                                                                                                                                                                                                                                     | 2  | 8   | 9  |    |    |                                          |   |   |   |   |                      |  |  |  |  |              |   |   |   |   |           |   |   |   |   |                              |   |   |   |   |                     |   |   |   |   |                     |  |  |  |  |                |   |   |   |   |                                |  |  |  |  |                  |   |   |   |   |                                                             |   |   |   |   |  |

|                                                                                                                                                                                                                                                                                                                                                            |                                                                                                                                                                                                                                                                                                                                                          |                                          |
|------------------------------------------------------------------------------------------------------------------------------------------------------------------------------------------------------------------------------------------------------------------------------------------------------------------------------------------------------------|----------------------------------------------------------------------------------------------------------------------------------------------------------------------------------------------------------------------------------------------------------------------------------------------------------------------------------------------------------|------------------------------------------|
| <p>75. Was the result of this birth (twins, triples, etc.)?</p> <p>76. What was the result of your last pregnancy?</p> <div style="border: 1px solid black; padding: 2px; margin: 5px 0;"> <p><b>FOR MULTIPLE BIRTHS CODE 1 IF ONE OR MORE CHILDREN LIVED, CODE 2 ONLY IF ALL CHILDREN DIED</b></p> </div> <p>77. When was the baby born (the babies)?</p> | <p>Yes ..... 1</p> <p style="padding-left: 100px;">How many babies were born?  __ </p> <p>No ..... 2</p> <p>NO RESPONSE ..... 9</p> <p>Born alive ..... 1</p> <p>Born dead ..... 2</p> <p>Miscarriage ..... 3</p><br><p>Day.....  __ </p> <p>Month.....  __ </p> <p>Year .....  __   __   __ </p> <p>DON'T KNOW ..... 98</p> <p>NO RESPONSE ..... 99</p> | <p style="text-align: right;">] → 87</p> |
| <p>78. What is (are) the name of your son(s) and/or daughter(s)?</p> <div style="border: 1px solid black; padding: 2px; margin: 5px 0;"> <p><b>NOTE THEIR CODE AND THEIR NAME. IF THE BABY DIED, CODE THEM AS 00</b></p> </div>                                                                                                                            | <p>Name</p> <p>Code  __   __ </p> <p>Name</p> <p>Code  __   __ </p> <p>Name</p> <p>Code  __   __ </p>                                                                                                                                                                                                                                                    |                                          |
| <p>79. Who attended to you during this birth?</p>                                                                                                                                                                                                                                                                                                          | <p>Doctor ..... 01</p> <p>Nurse ..... 02</p> <p>Midwife ..... 03</p> <p>Community Auxiliary ..... 04</p> <p>Health Promoter ..... 05</p> <p>No one ..... 06</p> <p>Family ..... 07</p> <p>Other _____ 08</p> <p style="padding-left: 100px;">(specify)</p> <p>DON'T KNOW ..... 98</p> <p>NO RESPONSE..... 99</p>                                         |                                          |

|                                                                                                                                                                                                                                                     |                                                                                                                                                                                                                                                                                                                                                                                                                                                                                                                                                                                                       |                      |
|-----------------------------------------------------------------------------------------------------------------------------------------------------------------------------------------------------------------------------------------------------|-------------------------------------------------------------------------------------------------------------------------------------------------------------------------------------------------------------------------------------------------------------------------------------------------------------------------------------------------------------------------------------------------------------------------------------------------------------------------------------------------------------------------------------------------------------------------------------------------------|----------------------|
| <p>80. Where did you give birth?</p>                                                                                                                                                                                                                | <p><b>IMSS</b></p> <ul style="list-style-type: none"> <li>- Clinica or Hospital ..... 01</li> <li>- Clinic Solidaridad ..... 02</li> </ul> <p><b>SSA</b></p> <ul style="list-style-type: none"> <li>- Health Center or Hospital ..... 03</li> <li>- Health Auxiliary ..... 04</li> </ul> <p><b>ISSSTE</b> ..... 05</p> <p><b>DIF</b> ..... 06</p> <p>Other government institutions ..... 07</p> <p>Clinic or Private Hospital ..... 08</p> <p>Midwife's home ..... 09</p> <p>Woman's home ..... 10</p> <p>Other _____ 11</p> <p style="text-align: center;">(specify)</p> <p>NO RESPONSE ..... 99</p> |                      |
| <p>81. How many days after birth was your son(s)/daughter(s) weighed?</p> <p>82. How much did (NAME) weigh at birth?</p> <p style="border: 1px solid black; padding: 2px; text-align: center;"><b>MAKE SURE TO KEEP THE SAME ORDER AS IN 78</b></p> | <p style="text-align: right;">Days  __ __ </p> <p>He/she was not weighed ..... 1</p> <p>DON'T KNOW ..... 2</p> <p>NO RESPONSE ..... 9</p> <p style="text-align: right;">Weight in kilograms  __ . _ _ _ _ </p> <p style="text-align: right;">Weight in kilograms  __ . _ _ _ _ </p> <p style="text-align: right;">Weight in kilograms  __ . _ _ _ _ </p> <p>DON'T KNOW ..... 9888</p> <p>NO RESPONSE ..... 9999</p>                                                                                                                                                                                   | <p>→ 83</p>          |
| <p>83. Have you ever breastfed your child even for a short period?</p>                                                                                                                                                                              | <p>Yes ..... 1</p> <p>No ..... 2</p> <p>DON'T KNOW ..... 8</p> <p>NO RESPONSE ..... 9</p>                                                                                                                                                                                                                                                                                                                                                                                                                                                                                                             | <p>]</p> <p>→ 87</p> |
| <p>84. How many months did you breastfeed for?</p> <p style="border: 1px solid black; padding: 2px; text-align: center;"><b>MAKE SURE TO KEEP THE SAME ORDER AS IN 78</b></p>                                                                       | <p style="text-align: right;">Months  __ __ </p> <p style="text-align: right;">Months  __ __ </p> <p style="text-align: right;">Months  __ __ </p> <p>Died while breastfeeding ..... 77</p> <p>Still breastfeeding ..... 78</p> <p>DON'T KNOW ..... 98</p> <p>NO RESPONSE ..... 99</p>                                                                                                                                                                                                                                                                                                                |                      |

|                                                                                                                                                                                                                                                                                                                                                                                                          |                                                                                                                                                                                                                                                                                                                                                                                                                                                                                                                                                         |  |               |  |               |  |               |
|----------------------------------------------------------------------------------------------------------------------------------------------------------------------------------------------------------------------------------------------------------------------------------------------------------------------------------------------------------------------------------------------------------|---------------------------------------------------------------------------------------------------------------------------------------------------------------------------------------------------------------------------------------------------------------------------------------------------------------------------------------------------------------------------------------------------------------------------------------------------------------------------------------------------------------------------------------------------------|--|---------------|--|---------------|--|---------------|
| <p>85. How old was your child when you began to give him/her other types of food (including formula or cow's milk)?</p> <p style="text-align: center;"><b>MAKE SURE TO KEEP THE SAME ORDER AS IN 78</b></p> <p>86. Before beginning to give him/her other food or milk on a daily basis, did you first give your child other liquids?</p> <p style="text-align: center;"><b>CIRCLE ALL MENTIONED</b></p> | <table style="width: 100%;"> <tr> <td style="width: 50%;"></td> <td style="width: 50%;">Months  __ __ </td> </tr> <tr> <td></td> <td>Months  __ __ </td> </tr> <tr> <td></td> <td>Months  __ __ </td> </tr> </table> <p>Less than a month ..... 00<br/> Died after alimantation ..... 04<br/> Only breast milk ..... 05<br/> DON'T KNOW ..... 98<br/> NO RESPONSE ..... 99</p> <p>Yes</p> <p>Tea ..... 1<br/> Water ..... 2<br/> Sugar water ..... 3<br/> Otro ..... 4</p> <p>_____ (specify) ..... 4</p> <p>No ..... 5<br/> Don't remember ..... 9</p> |  | Months  __ __ |  | Months  __ __ |  | Months  __ __ |
|                                                                                                                                                                                                                                                                                                                                                                                                          | Months  __ __                                                                                                                                                                                                                                                                                                                                                                                                                                                                                                                                           |  |               |  |               |  |               |
|                                                                                                                                                                                                                                                                                                                                                                                                          | Months  __ __                                                                                                                                                                                                                                                                                                                                                                                                                                                                                                                                           |  |               |  |               |  |               |
|                                                                                                                                                                                                                                                                                                                                                                                                          | Months  __ __                                                                                                                                                                                                                                                                                                                                                                                                                                                                                                                                           |  |               |  |               |  |               |

| VIII. ADDICTIONS (FOR ALL TEENAGERS)                                                                                                                                                                                | SKIP TO               |
|---------------------------------------------------------------------------------------------------------------------------------------------------------------------------------------------------------------------|-----------------------|
| <p>87. Have you ever smoked a cigarette in your life even if it was only one or two or even just a drag of a cigarette?</p> <p>Yes ..... 1<br/> No ..... 2<br/> NO RESPONSE ..... 9</p>                             | <p>]</p> <p>→ 93</p>  |
| <p>88. Do you currently smoke?</p> <p>Yes ..... 1<br/> No ..... 2<br/> NO RESPONSE ..... 9</p>                                                                                                                      | <p>]</p> <p>→ 93</p>  |
| <p>89. How old were you when you began to smoke cigarettes regularly (at least one cigarette per month)?</p> <p style="text-align: right;">NO RESPONSE ..... 99</p> <p style="text-align: right;">YEARS  __ __ </p> |                       |
| <p>90. During the week did you smoke.....</p> <p>1 or 2 days? ..... 1<br/> 3 or 4 days? ..... 2<br/> 5 or 6 days ? ..... 3<br/> Daily? ..... 4<br/> Never ..... 0<br/> NO RESPONSE ..... 9</p>                      |                       |
| <p>91. On a normal day, how many cigarettes do you usually smoke?</p> <p style="text-align: right;">NUMBER  __ __ </p> <p>NO RESPONSE ..... 99</p>                                                                  |                       |
| <p>92. During the <b>last week</b> , how much money did you spend on cigarettes?</p> <p style="text-align: right;">AMOUNT \$  __ __ __ </p> <p>More than \$980 ..... 980<br/> NO RESPONSE ..... 999</p>             |                       |
| <p>93. Do you drink alcoholic drinks even if it is very occasionally?</p> <p>Yes ..... 1<br/> No ..... 2<br/> NO RESPONSE ..... 9</p>                                                                               | <p>]</p> <p>→ 101</p> |

| VIII. ADDICTIONS (FOR ALL TEENAGERS)                                                                                        |                                                                                                                                                                                                                                                                                                                                                                                                                                                                       | SKIP TO                    |  |
|-----------------------------------------------------------------------------------------------------------------------------|-----------------------------------------------------------------------------------------------------------------------------------------------------------------------------------------------------------------------------------------------------------------------------------------------------------------------------------------------------------------------------------------------------------------------------------------------------------------------|----------------------------|--|
| 94. On average, how many beers, wine coolers, etc. do you drink during the week?                                            | <p style="text-align: right;"><b>BEERS</b>  __ __ </p> Does not drink ..... 00<br>NO RESPONSE ..... 99                                                                                                                                                                                                                                                                                                                                                                |                            |  |
| 95. On average, how many cups of tequila , rum, aguardiente, etc. do you drink during the week?                             | <p style="text-align: right;"><b>CUPS</b>  __ __ </p> Does not drink ..... 00<br>NO RESPONSE ..... 99                                                                                                                                                                                                                                                                                                                                                                 |                            |  |
| 96. In the last month, how often did you get drunk?                                                                         | Did not drink last month ..... 1<br>One time ..... 2<br>2 or 3 times in the past month ..... 3<br>One or more times per week ..... 4<br>NO RESPONSE ..... 9                                                                                                                                                                                                                                                                                                           |                            |  |
| 97. During the <b>last week</b> , how much money did you spend on alcoholic drinks?                                         | <p style="text-align: right;"><b>AMOUNT \$</b>  __ __ </p> More than \$980 ..... 980<br>NO RESPONSE ..... 999                                                                                                                                                                                                                                                                                                                                                         |                            |  |
| 98. During the past four weeks, was there any occasion that you couldn't take care of your daily activities due to alcohol? | Yes ..... 1<br>No ..... 2<br>NO RESPONSE ..... 9                                                                                                                                                                                                                                                                                                                                                                                                                      |                            |  |
| 99. Does alcohol ever make you feel violent?                                                                                | Yes ..... 1<br>No ..... 2<br>NO RESPONSE ..... 9                                                                                                                                                                                                                                                                                                                                                                                                                      | ]<br><br>→ 101             |  |
| 100. How frequently would you say this happens?                                                                             | Rarely ..... 1<br>Some time ..... 2<br>Frequently ..... 3<br>Almost always ..... 4<br>NO RESPONSE ..... 9                                                                                                                                                                                                                                                                                                                                                             |                            |  |
| <b>IF AT LEAST ONE RESPONSE IS YES, CONTINUE. IF NOT THANK THEM AND END</b>                                                 |                                                                                                                                                                                                                                                                                                                                                                                                                                                                       | <b>Yes      No      NR</b> |  |
| 101. Could you tell me if you have taken, used or tried.....                                                                | <b>INHALANTS</b><br>(thinner, glue, paint)? 1      2      9<br><b>MARIJUANA?</b> 1      2      9<br><b>HALUCINOGENS</b><br>(mushrooms, peyote, mescaline, LSD)? 1      2      9<br><b>COCAINE</b> 1      2      9<br><b>AMPHETAMINES</b><br>(Stimulants for weight loss or to give energy)? 1      2      9<br><b>SEDATIVES</b><br>(tranquilizers)? 1      2      9<br><b>OPIATES</b><br>(heroin and morphine)? 1      2      9<br><b>OTHER DRUGS</b> 1      2      9 |                            |  |
|                                                                                                                             |                                                                                                                                                                                                                                                                                                                                                                                                                                                                       | (specify)                  |  |

|                                                                                           |                                                                                                           |              |
|-------------------------------------------------------------------------------------------|-----------------------------------------------------------------------------------------------------------|--------------|
| 102. During the last four weeks, how many days have you consumed any of these substances? | <p style="text-align: right;">Days  __ __ </p> NO RESPONSE ..... 99                                       | <b>→ END</b> |
| 103. During the last week, how much money did you spend buying these substances?          | <p style="text-align: right;">AMOUNT \$  __ __ __ </p> More than \$980 ..... 980<br>NO RESPONSE ..... 999 |              |

**THANK THEM AND END**

**TO BE FILLED OUT BY THE INTERVIEWER**

|                                                                                 |                                                                                                                    |  |
|---------------------------------------------------------------------------------|--------------------------------------------------------------------------------------------------------------------|--|
| 104. During the interview, how well did the informant understand the questions? | Very well ..... 1<br>Well ..... 2<br>OK ..... 3<br>Very little ..... 4                                             |  |
| 105. How reliable do you think the responses were?                              | Very reliable ..... 1<br>Reliable ..... 2<br>More or less reliable ..... 3<br>Not reliable ..... 4                 |  |
| 106. During the interview, the interviewee:                                     | Showed a lot of interest ..... 1<br>Showed little interest ..... 2<br>Showed apathy ..... 3<br>Was hostile ..... 4 |  |

|                     |
|---------------------|
| <b>OBSERVATIONS</b> |
|                     |
|                     |
|                     |
|                     |
|                     |



ALL INDIVIDUALS 15 TO 21 YEARS

SEXUAL EXPERIENCE AND KNOWLEDGE OF CONTRACEPTIVE METHODS

| N<br>U<br>M<br>E<br>R<br>O<br>D<br>E<br>R<br>E<br>N<br>G<br>L<br>O<br>N | 27    | 28                                                                                                                                                        | 29                                                                                                                                                                                                                                                                                                                                                                                                         | 30                                                                                                                                                        | 31                                                                                                     |
|-------------------------------------------------------------------------|-------|-----------------------------------------------------------------------------------------------------------------------------------------------------------|------------------------------------------------------------------------------------------------------------------------------------------------------------------------------------------------------------------------------------------------------------------------------------------------------------------------------------------------------------------------------------------------------------|-----------------------------------------------------------------------------------------------------------------------------------------------------------|--------------------------------------------------------------------------------------------------------|
|                                                                         |       | Do you know or have heard about any method to avoid pregnancy or not having babies?<br><br>Yes ..... 1<br>No ..... 2<br>NO<br>PASE A 29<br>DON'T ANSWER 9 | Which methods have you heard or do you know?<br><b>DO NOT PROMT; CHECK THE FIRST 3 MENTIONED</b><br><br>Pills .....01<br>IUD.....02<br>Injections.....03<br>Norplant .....04<br>Ovules, diafagram.....05<br>Condom .....06<br>Femele surgery 07<br>Male surgery .....08<br>Billings, abstinence, temperature .09<br>Coitus interrumpus.....10<br>Other.....11<br>DON'T KNOW .....98<br>DON'T ANSWER.....99 | At what age did you have your firsy sexual intercourse?<br><br>HAVEN'T HAD SEXUAL INTER-COURSE ..... 000<br>DON'T KNOW 98<br>DON'T ANSWER 99<br>PASE A 35 | Have you had sexual intercourses in the last 4 weeks?<br><br>Yes.....1<br>No .....2<br>DON'T ANSWER 99 |
|                                                                         | →     | →                                                                                                                                                         | →<br>EDAD                                                                                                                                                                                                                                                                                                                                                                                                  | →                                                                                                                                                         | →                                                                                                      |
| 01                                                                      | 1 2 9 | □ □ □ □ □ □ □ □ □ □                                                                                                                                       | □ □ □                                                                                                                                                                                                                                                                                                                                                                                                      | 1 2 9                                                                                                                                                     | □ □ □                                                                                                  |
| 02                                                                      | 1 2 9 | □ □ □ □ □ □ □ □ □ □                                                                                                                                       | □ □ □                                                                                                                                                                                                                                                                                                                                                                                                      | 1 2 9                                                                                                                                                     | □ □ □                                                                                                  |
| 03                                                                      | 1 2 9 | □ □ □ □ □ □ □ □ □ □                                                                                                                                       | □ □ □                                                                                                                                                                                                                                                                                                                                                                                                      | 1 2 9                                                                                                                                                     | □ □ □                                                                                                  |
| 04                                                                      | 1 2 9 | □ □ □ □ □ □ □ □ □ □                                                                                                                                       | □ □ □                                                                                                                                                                                                                                                                                                                                                                                                      | 1 2 9                                                                                                                                                     | □ □ □                                                                                                  |
| 05                                                                      | 1 2 9 | □ □ □ □ □ □ □ □ □ □                                                                                                                                       | □ □ □                                                                                                                                                                                                                                                                                                                                                                                                      | 1 2 9                                                                                                                                                     | □ □ □                                                                                                  |
| 06                                                                      | 1 2 9 | □ □ □ □ □ □ □ □ □ □                                                                                                                                       | □ □ □                                                                                                                                                                                                                                                                                                                                                                                                      | 1 2 9                                                                                                                                                     | □ □ □                                                                                                  |
| 07                                                                      | 1 2 9 | □ □ □ □ □ □ □ □ □ □                                                                                                                                       | □ □ □                                                                                                                                                                                                                                                                                                                                                                                                      | 1 2 9                                                                                                                                                     | □ □ □                                                                                                  |
| 08                                                                      | 1 2 9 | □ □ □ □ □ □ □ □ □ □                                                                                                                                       | □ □ □                                                                                                                                                                                                                                                                                                                                                                                                      | 1 2 9                                                                                                                                                     | □ □ □                                                                                                  |
| 09                                                                      | 1 2 9 | □ □ □ □ □ □ □ □ □ □                                                                                                                                       | □ □ □                                                                                                                                                                                                                                                                                                                                                                                                      | 1 2 9                                                                                                                                                     | □ □ □                                                                                                  |
| 10                                                                      | 1 2 9 | □ □ □ □ □ □ □ □ □ □                                                                                                                                       | □ □ □                                                                                                                                                                                                                                                                                                                                                                                                      | 1 2 9                                                                                                                                                     | □ □ □                                                                                                  |

ALL INDIVIDUALS 15 TO 21 YEARS

SEXUAL EXPERIENCE AND KNOWLEDGE OF CONTRACEPTIVE METHODS

| N<br>U<br>M<br>B<br>E<br>R<br>O<br>F<br>R<br>E<br>S<br>I<br>D<br>E<br>N<br>T<br>S | 32        | 33                                                                                                                              | 34                                                                                                                                                                                                                                  | 35                                                                                                                                                                                                                                                |
|-----------------------------------------------------------------------------------|-----------|---------------------------------------------------------------------------------------------------------------------------------|-------------------------------------------------------------------------------------------------------------------------------------------------------------------------------------------------------------------------------------|---------------------------------------------------------------------------------------------------------------------------------------------------------------------------------------------------------------------------------------------------|
|                                                                                   |           | Who decided to use (METHOD) at that time?<br><br>She.....1<br>He.....2<br>Both.....3<br>DON'T KNOW 8<br>DON'T ANSWER 9<br><br>→ | Some adolescents have sexual intercourses to get money, gifts, food or other favors. Do you have had a sexual intercourse for some of these reasons?<br><br>Yes.....1<br>]<br>No.....2<br><br>PASE A 35<br> <br>→<br>DON'T ANSWER 9 | When was the last time you had a sexual intercourse to get money, gift or food?<br><br>Last week.....1<br>Withn last 4 weeks.....2<br>Withn last 6 months.....3<br>Withn last year.....4<br>More than a year ago.....5<br>DON'T ANSWER 9<br><br>→ |
| 01                                                                                | 1 2 3 8 9 | 1 2 9                                                                                                                           | 1 2 3 4 5 9                                                                                                                                                                                                                         | 1 2 3 4 5 6 7 8 9                                                                                                                                                                                                                                 |
| 02                                                                                | 1 2 3 8 9 | 1 2 9                                                                                                                           | 1 2 3 4 5 9                                                                                                                                                                                                                         | 1 2 3 4 5 6 7 8 9                                                                                                                                                                                                                                 |
| 03                                                                                | 1 2 3 8 9 | 1 2 9                                                                                                                           | 1 2 3 4 5 9                                                                                                                                                                                                                         | 1 2 3 4 5 6 7 8 9                                                                                                                                                                                                                                 |
| 04                                                                                | 1 2 3 8 9 | 1 2 9                                                                                                                           | 1 2 3 4 5 9                                                                                                                                                                                                                         | 1 2 3 4 5 6 7 8 9                                                                                                                                                                                                                                 |
| 05                                                                                | 1 2 3 8 9 | 1 2 9                                                                                                                           | 1 2 3 4 5 9                                                                                                                                                                                                                         | 1 2 3 4 5 6 7 8 9                                                                                                                                                                                                                                 |
| 06                                                                                | 1 2 3 8 9 | 1 2 9                                                                                                                           | 1 2 3 4 5 9                                                                                                                                                                                                                         | 1 2 3 4 5 6 7 8 9                                                                                                                                                                                                                                 |
| 07                                                                                | 1 2 3 8 9 | 1 2 9                                                                                                                           | 1 2 3 4 5 9                                                                                                                                                                                                                         | 1 2 3 4 5 6 7 8 9                                                                                                                                                                                                                                 |
| 08                                                                                | 1 2 3 8 9 | 1 2 9                                                                                                                           | 1 2 3 4 5 9                                                                                                                                                                                                                         | 1 2 3 4 5 6 7 8 9                                                                                                                                                                                                                                 |
| 09                                                                                | 1 2 3 8 9 | 1 2 9                                                                                                                           | 1 2 3 4 5 9                                                                                                                                                                                                                         | 1 2 3 4 5 6 7 8 9                                                                                                                                                                                                                                 |
| 10                                                                                | 1 2 3 8 9 | 1 2 9                                                                                                                           | 1 2 3 4 5 9                                                                                                                                                                                                                         | 1 2 3 4 5 6 7 8 9                                                                                                                                                                                                                                 |
